# Supplementary material for: Enhanced lithium storage performances of novel layered nickel germanate anodes inspired by the spatial arrangement of lotus leaves
Source: Royal Society of Chemistry journal article supplement (doi:10.1039/c8nr02857e), 2018-01-01
Supplement: c8nr02857e1.pdf [file c8nr02857e1.pdf]

## Supporting Information

### **Enhanced Lithium Storage Performances of Novel Layered Nickel Germanate Anodes Inspired by Spatial Arrangement of Lotus Leaves**

Hui-Si Li<sup>1,2</sup>, Jin Qu<sup>1\*</sup>, Shu-Meng Hao<sup>1</sup>, Zhen-Zhen Wang<sup>1</sup>, Yu-Jiao Zhang<sup>2</sup>, Zhong-Zhen Yu<sup>1,2\*</sup>

<sup>1</sup> State Key Laboratory of Organic-Inorganic Composites, College of Materials Science and Engineering, Beijing University of Chemical Technology, Beijing 100029, China

<sup>2</sup> Beijing Key Laboratory of Advanced Functional Polymer Composites, Beijing University of Chemical Technology, Beijing 100029, China

**E-mail:** qujin@mail.buct.edu.cn (J. Qu), yuzz@mail.buct.edu.cn (Z.-Z. Yu)

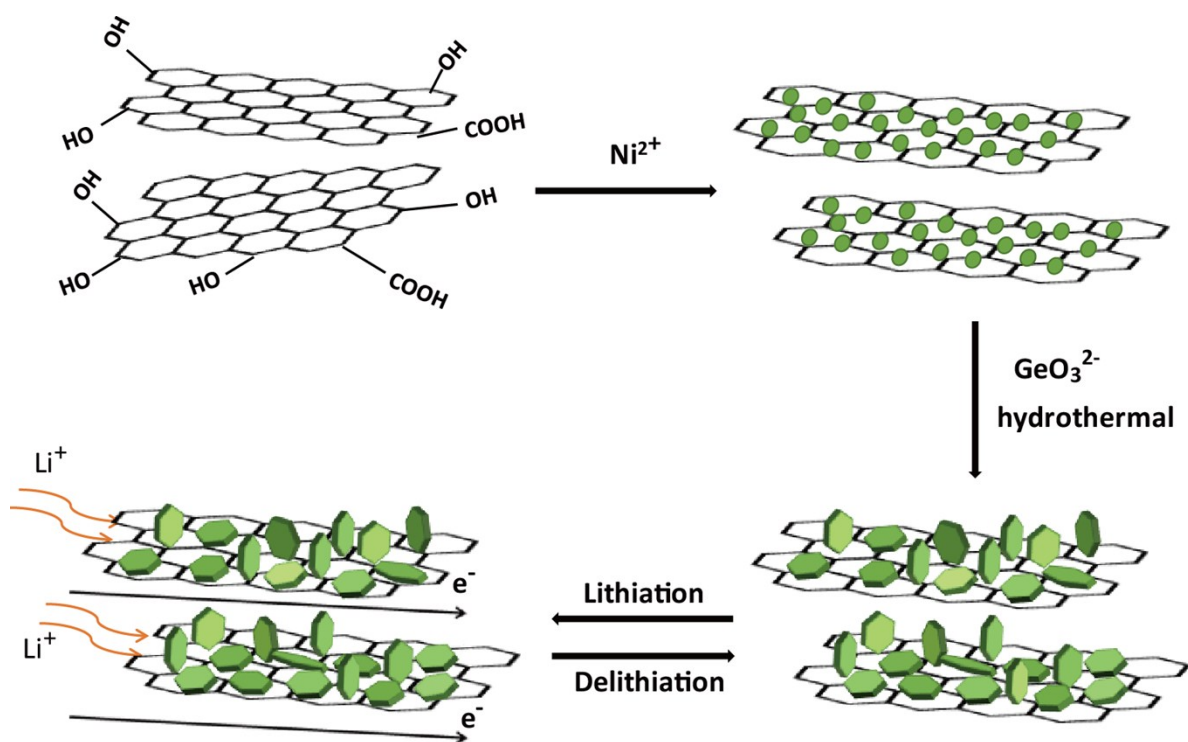

**Figure S1.** Schematic illustrating the synthesis of  $\text{Ni}_3\text{Ge}_2\text{O}_5(\text{OH})_4/\text{RGO}$  hybrids.

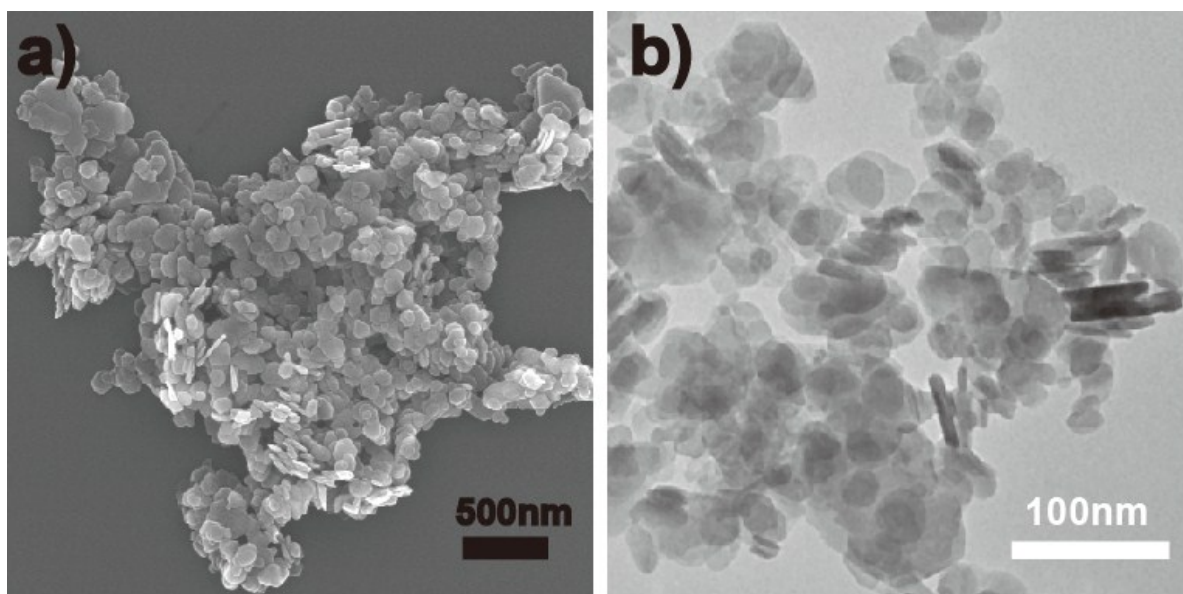

**Figure S2.** (a) SEM and (b) TEM images of  $\text{Ni}_3\text{Ge}_2\text{O}_5(\text{OH})_4$  nanosheets.

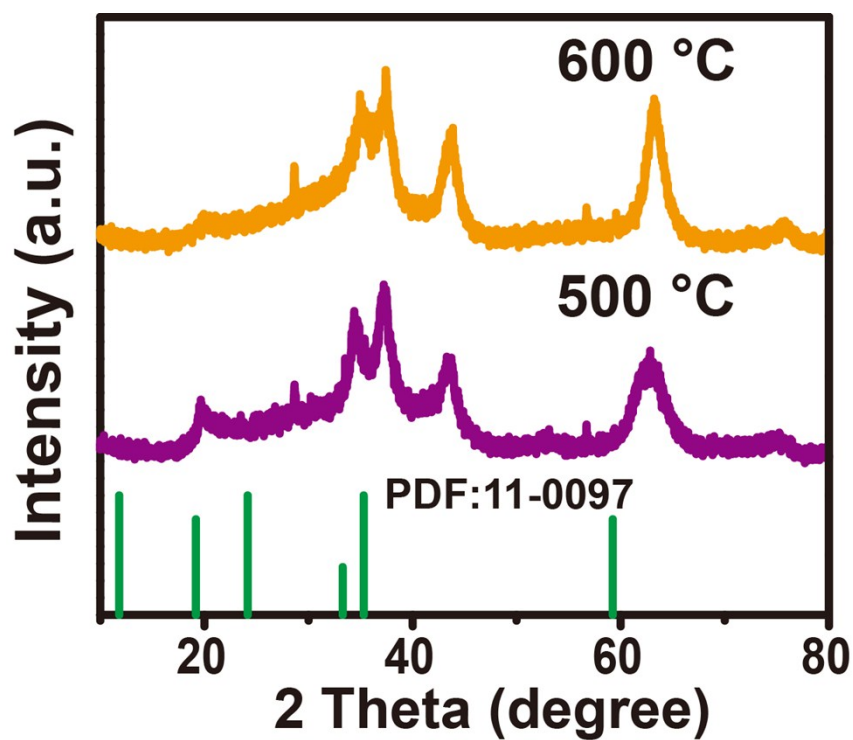

**Figure S3.** XRD patterns of  $\text{Ni}_3\text{Ge}_2\text{O}_5(\text{OH})_4/\text{RGO}-120$  thermally annealed at different temperatures.

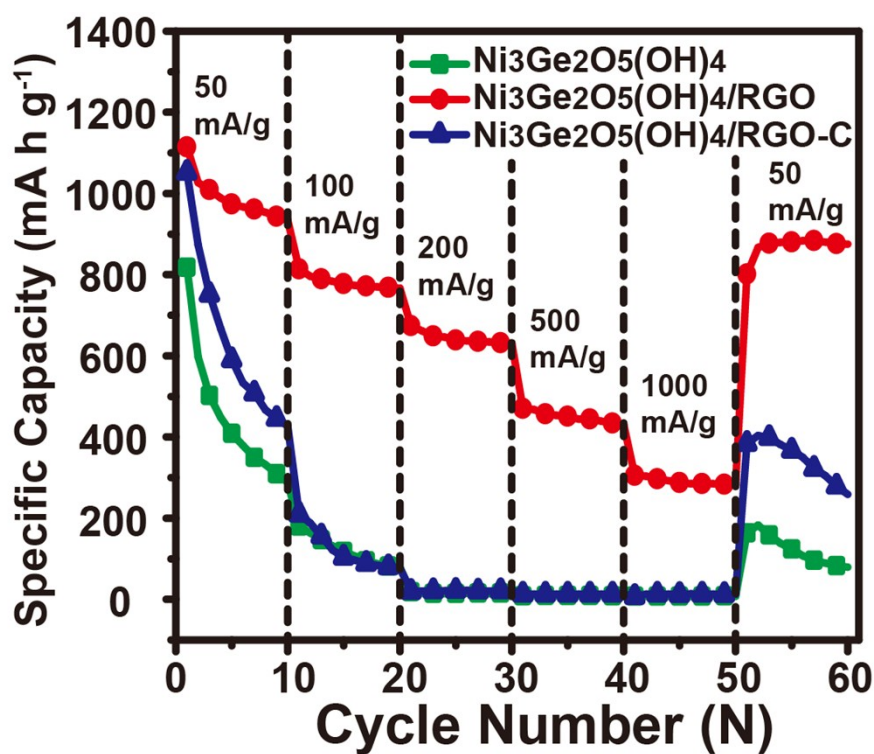

**Figure S4.** Rate performances of  $\text{Ni}_3\text{Ge}_2\text{O}_5(\text{OH})_4$ ,  $\text{Ni}_3\text{Ge}_2\text{O}_5(\text{OH})_4/\text{RGO}-\text{C}$ , and  $\text{Ni}_3\text{Ge}_2\text{O}_5(\text{OH})_4/\text{RGO}$  hybrids thermally annealed at 300 °C.

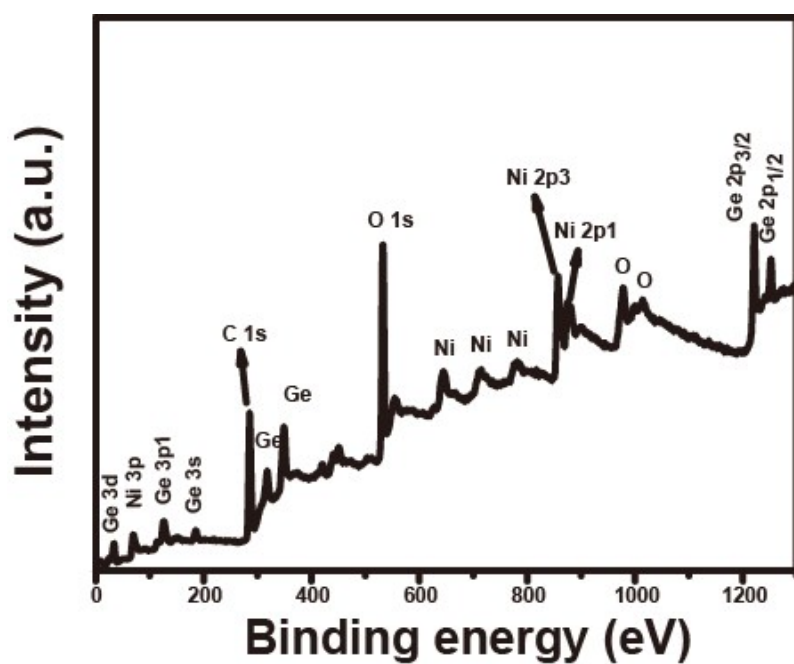

**Figure S5.** Wide-survey XPS spectrum of  $\text{Ni}_3\text{Ge}_2\text{O}_5(\text{OH})_4/\text{RGO}$ -120 hybrid.

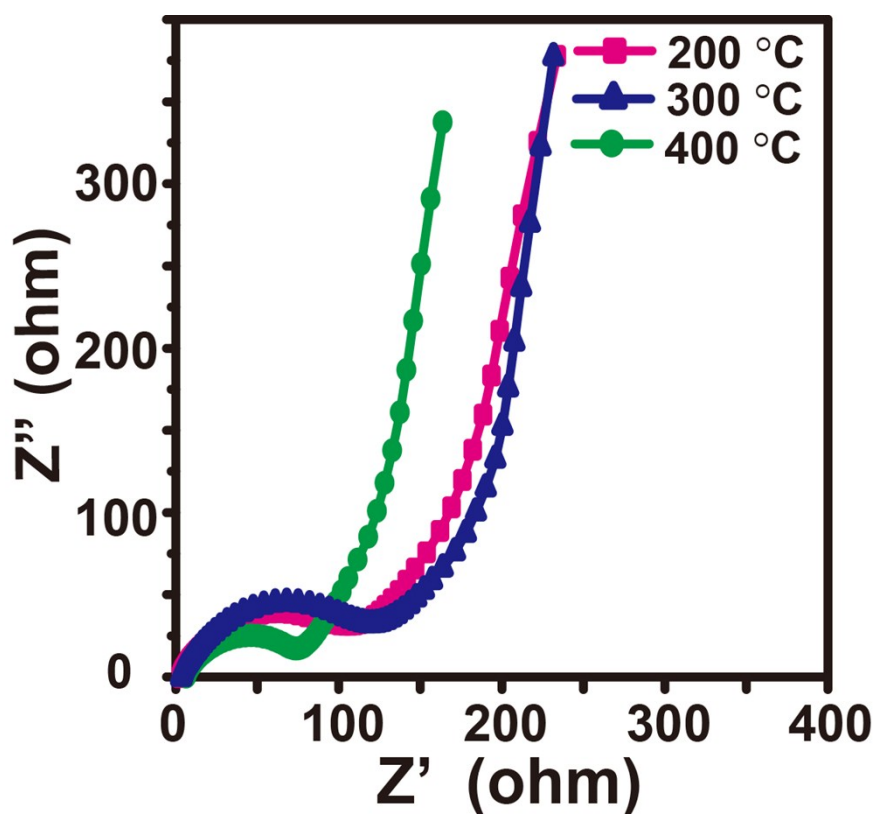

**Figure S6.** EIS curves of  $\text{Ni}_3\text{Ge}_2\text{O}_5(\text{OH})_4/\text{RGO}$  hybrids thermally annealed at different temperatures.
